# Supplementary material
Source: Springer Nature journal article supplement (https://www.springermedizin.de/resource/supplementary/12985_2006_198_MOESM3_ESM.pdf/9607474)
Supplement: MOESM3 [file 9607474]

|        |                            |                            |                            |                            |                            |     |
|--------|----------------------------|----------------------------|----------------------------|----------------------------|----------------------------|-----|
| PERV-C | <a href="#">YTSSGQFNY</a>  | -----                      | <a href="#">-LTWIRTGSP</a> | <a href="#">KCSPSDLDDL</a> | <a href="#">KISFTEKGGQ</a> | 38  |
| PERV-A | <a href="#">PTSYNQFNYG</a> | <a href="#">HGRWKDWQQR</a> | <a href="#">VQKDVRNKQI</a> | <a href="#">SCHSLDLDDL</a> | <a href="#">KISFTEKGGQ</a> | 50  |
| 13910  | <a href="#">PTSYNQFNYG</a> | <a href="#">HGRWKDWQQR</a> | <a href="#">VQKDVRNKQI</a> | <a href="#">SCHSLDLDDL</a> | <a href="#">KISFTEKGGQ</a> | 50  |
| 15149  | <a href="#">PTSYNQFNYG</a> | <a href="#">HGRWKDWQQR</a> | <a href="#">VQKDVRNKQI</a> | <a href="#">SCHSLDLDDL</a> | <a href="#">KISFTEKGGQ</a> | 49  |
| 13653  | <a href="#">PTSYNQFNYG</a> | <a href="#">HGRWKDWQQR</a> | <a href="#">VQKD-RNKQI</a> | <a href="#">SCHSLDLDDL</a> | <a href="#">KISFTEKGGQ</a> | 50  |
| 15150  | <a href="#">PTSYNQFNYG</a> | <a href="#">HGRWKDWQQR</a> | <a href="#">VQKDVRNKQI</a> | <a href="#">SCHSLDLDDL</a> | <a href="#">KISFTEKGGQ</a> | 50  |
| PERV-C | <a href="#">ENILKWVNGM</a> | <a href="#">SWGIVYYGGS</a> | <a href="#">GKQPGSILTI</a> | <a href="#">RLKIN-QLEP</a> | <a href="#">PMAIGPNTVL</a> | 87  |
| PERV-A | <a href="#">ENIQKWVNGI</a> | <a href="#">SWGIVYYGGS</a> | <a href="#">GRKKGSVLTI</a> | <a href="#">RLRIETQMEP</a> | <a href="#">PVAIGPNKGL</a> | 100 |
| 13910  | <a href="#">ENIQKWVNGM</a> | <a href="#">SWGIVYYGGS</a> | <a href="#">GRKKGSVLTI</a> | <a href="#">RLRIETQMEP</a> | <a href="#">PVAIGPNKGL</a> | 100 |
| 15149  | <a href="#">ENIQKWVNGM</a> | <a href="#">SWGIVYYGGS</a> | <a href="#">GRKKGSVLTI</a> | <a href="#">RLRIETQMEP</a> | <a href="#">PVAIGPNKGL</a> | 99  |
| 13653  | <a href="#">ENIQKWVNGM</a> | <a href="#">SWGIVYYGGS</a> | <a href="#">GRKKGSVLTI</a> | <a href="#">RLRIETQMEP</a> | <a href="#">PVAIGPNEG</a>  | 100 |
| 15150  | <a href="#">ENIQKWVNGM</a> | <a href="#">SWGIVYYGGS</a> | <a href="#">GRKKGSVLTI</a> | <a href="#">RLRIETQMEP</a> | <a href="#">PVAIGPNKGL</a> | 100 |
| PERV-C | <a href="#">TGQRPTTQ--</a> | <a href="#">--GPGPS-SN</a> | <a href="#">ITSGSDPTES</a> | <a href="#">SSTTKMGAKL</a> | <a href="#">FSLIQGAFQA</a> | 132 |
| PERV-A | <a href="#">AEQGPPIQEQ</a> | <a href="#">RPSNPSPDYN</a> | <a href="#">TTSGSVPTEP</a> | <a href="#">NITIKTGAKL</a> | <a href="#">FSLIQGAFQA</a> | 150 |
| 13910  | <a href="#">AEQGPPIQEQ</a> | <a href="#">RPSNPSPDYN</a> | <a href="#">TTSGSVPTEP</a> | <a href="#">NITIKTGAKL</a> | <a href="#">FNLIQGAFQA</a> | 150 |
| 15149  | <a href="#">AKQGPPIQEQ</a> | <a href="#">RPSNPSPDYN</a> | <a href="#">TTSGSVPTEP</a> | <a href="#">NITIKTGAKL</a> | <a href="#">FNLIQGAFQA</a> | 149 |
| 13653  | <a href="#">AEQGPPIQEQ</a> | <a href="#">RPSNPSPDYN</a> | <a href="#">TTSGSVPTEP</a> | <a href="#">NITIKTGAKL</a> | <a href="#">FNLIQGAFQA</a> | 150 |
| 15150  | <a href="#">AEQGPPIQEQ</a> | <a href="#">RPSNPSPDYN</a> | <a href="#">TTSGSVPTEP</a> | <a href="#">NITIKTGAKL</a> | <a href="#">FNLIQGAFQA</a> | 150 |
| PERV-C | <a href="#">LNSTTPEATS</a> | <a href="#">SCWLCLASGP</a> | <a href="#">PYYEGMARRG</a> | <a href="#">KFNVTKEHRD</a> | <a href="#">QCTWGSQNK</a>  | 182 |
| PERV-A | <a href="#">LNSTTPEATS</a> | <a href="#">SCWLCLASGP</a> | <a href="#">PYYEGMARGG</a> | <a href="#">KFNVTKEHRD</a> | <a href="#">QCTWGSQNK</a>  | 200 |
| 13910  | <a href="#">LNSTTPEATS</a> | <a href="#">SCWLCLASGP</a> | <a href="#">PYYEGMARGG</a> | <a href="#">KFNVTKEHRD</a> | <a href="#">QCTWGSQNK</a>  | 200 |
| 15149  | <a href="#">LNSTTPEATS</a> | <a href="#">SCWLCLASGP</a> | <a href="#">PYYEGMARGG</a> | <a href="#">KFNVTKEHRD</a> | <a href="#">QCTWGSQNK</a>  | 199 |
| 13653  | <a href="#">LNSTTPEATS</a> | <a href="#">SCWLCLASGP</a> | <a href="#">PYYEGMARGG</a> | <a href="#">KFNVTKEHRD</a> | <a href="#">QCAWGSQNK</a>  | 200 |
| 15150  | <a href="#">LNSTTPEATS</a> | <a href="#">SCWLCLASGP</a> | <a href="#">PYYEGMARGG</a> | <a href="#">KFNVTKEHRD</a> | <a href="#">QCAWGSQNK</a>  | 200 |
| PERV-C | <a href="#">TLTEVSGKGT</a> | <a href="#">CIGKVPPSHQ</a> | <a href="#">HLCNHTEAFN</a> | <a href="#">QTSSESQYLP</a> | <a href="#">GYDRWWACNT</a> | 232 |
| PERV-A | <a href="#">TLTEVSGKGT</a> | <a href="#">CIGMVPPSHQ</a> | <a href="#">HLCNHTEAFN</a> | <a href="#">RTSESQYLP</a>  | <a href="#">GYDRWWACNT</a> | 250 |
| 13910  | <a href="#">TLTEVSGKGT</a> | <a href="#">CIGMVPPSHQ</a> | <a href="#">HLCNHTEAFN</a> | <a href="#">RTSESQYLP</a>  | <a href="#">GYDRWWACNT</a> | 249 |
| 15149  | <a href="#">TLTEVSGKGT</a> | <a href="#">CIGKVPPSHQ</a> | <a href="#">HLCNHTEAFN</a> | <a href="#">RTSESQYLP</a>  | <a href="#">GYDRWWACNT</a> | 249 |
| 13653  | <a href="#">TLTEVSGKGT</a> | <a href="#">CIGKVPPSHQ</a> | <a href="#">HLCNHTEAFN</a> | <a href="#">QTSSESQYLP</a> | <a href="#">GYDRWWACNT</a> | 250 |
| 15150  | <a href="#">TLTEVSGKGT</a> | <a href="#">CIGKVPPSHQ</a> | <a href="#">HLCNHTEAFN</a> | <a href="#">QTSSESQYLP</a> | <a href="#">GYDRWWACNT</a> | 250 |
| PERV-C | <a href="#">GLTPCVSTLV</a> | <a href="#">FNQTKDFCIM</a> | <a href="#">VQIVPRVYYY</a> | <a href="#">PEKAILDEYD</a> | <a href="#">YRNHRQKREP</a> | 282 |
| PERV-A | <a href="#">GLTPCVSTLV</a> | <a href="#">FNQTKDFCVM</a> | <a href="#">VQIVPRVYYY</a> | <a href="#">PEKAVLDEYD</a> | <a href="#">YRYNRPKREP</a> | 300 |
| 13910  | <a href="#">GLTPCVSTLV</a> | <a href="#">FNQTKDFCVM</a> | <a href="#">VQIVPRVYYY</a> | <a href="#">PEKAILDEYD</a> | <a href="#">YRNHRQKREP</a> | 299 |
| 15149  | <a href="#">GLTPCVSTLV</a> | <a href="#">FNQTKDFCVM</a> | <a href="#">VQIVPRVYYY</a> | <a href="#">PEKAVLDEYD</a> | <a href="#">YRNHRQKREP</a> | 299 |
| 13653  | <a href="#">GLTPCVSTLV</a> | <a href="#">FNQTKDFCIM</a> | <a href="#">VQIVPRVYYY</a> | <a href="#">PEKAILDEYD</a> | <a href="#">YRNHRQKREP</a> | 300 |
| 15150  | <a href="#">GLTPCVSTLV</a> | <a href="#">FNQTKDFCIM</a> | <a href="#">VQIVPRVYYY</a> | <a href="#">PEKAILDEYD</a> | <a href="#">YRNHRQKREP</a> | 300 |
| PERV-C | <a href="#">ISLTLAVMLG</a> | <a href="#">LGVAAGVGTG</a> | <a href="#">TAALVTGPQQ</a> | <a href="#">LETGLSNLHR</a> | <a href="#">IVTEDLQALE</a> | 332 |
| PERV-A | <a href="#">ISLTLAVMLG</a> | <a href="#">LGVAAGVGTG</a> | <a href="#">TAALITGPQQ</a> | <a href="#">LEKGLSNLHR</a> | <a href="#">IVTEDLQALE</a> | 350 |
| 13910  | <a href="#">ISLTLAVMLG</a> | <a href="#">LGVAAGVGTG</a> | <a href="#">TAALVTGPQQ</a> | <a href="#">LEAGLSNLHR</a> | <a href="#">IVIEDLQALE</a> | 349 |
| 15149  | <a href="#">ISLTLAVMLG</a> | <a href="#">LGVAAGVGTG</a> | <a href="#">TAALVTGPQQ</a> | <a href="#">LEAGLSNLHR</a> | <a href="#">IVIEDLQALE</a> | 349 |
| 13653  | <a href="#">ISLTLAVMLG</a> | <a href="#">LGVAAGVGTG</a> | <a href="#">TAALVTGPQQ</a> | <a href="#">LETGLSNLHR</a> | <a href="#">IVTEDLQALE</a> | 350 |
| 15150  | <a href="#">ISLTLAVMLG</a> | <a href="#">LGVAAGVGTG</a> | <a href="#">TAALVTGPQQ</a> | <a href="#">LETGLSNLHR</a> | <a href="#">IVTEDLQALE</a> | 350 |
| PERV-C | <a href="#">KSVSNLEESL</a> | <a href="#">TSLSEVVLQN</a> | <a href="#">RRGLDLLFLK</a> | <a href="#">EGGLCVALKE</a> | <a href="#">ECCFYVDHSG</a> | 382 |
| PERV-A | <a href="#">KSVSNLEESL</a> | <a href="#">TSLSEVVLQN</a> | <a href="#">RRGLDLLFLK</a> | <a href="#">EGGLCVALKE</a> | <a href="#">ECCFYVDHSG</a> | 400 |
| 13910  | <a href="#">KSVSNLEESL</a> | <a href="#">TSLSEVVLQN</a> | <a href="#">RRGLDLLFLK</a> | <a href="#">EGGLCVALKE</a> | <a href="#">ECCFYVDHSG</a> | 399 |
| 15149  | <a href="#">KSVSNLEESL</a> | <a href="#">TSLSEVVLQN</a> | <a href="#">RRGLDLLFLK</a> | <a href="#">EGGLCVALKE</a> | <a href="#">ECCFYVDHSG</a> | 399 |
| 13653  | <a href="#">KSVSNLEESL</a> | <a href="#">TSLSEVVLQN</a> | <a href="#">RRGLDLLFLK</a> | <a href="#">EGGLCVALKE</a> | <a href="#">ECCFYVDHSG</a> | 400 |
| 15150  | <a href="#">KSVSLEESL</a>  | <a href="#">TSLSEVVLQN</a> | <a href="#">RRGLDLLFLK</a> | <a href="#">EGGLCVALKE</a> | <a href="#">ECCFYVDHSG</a> | 400 |
| PERV-C | <a href="#">AIRDSMNKLR</a> | <a href="#">ERLEKRRREK</a> | <a href="#">ETTQGWFE</a>   |                            |                            | 408 |
| PERV-A | <a href="#">AIRDSMSKLR</a> | <a href="#">ERLERRRRER</a> | <a href="#">EADQGWFE</a>   |                            |                            | 426 |
| 13910  | <a href="#">AIRDSMSKLR</a> | <a href="#">ERLEKRRREK</a> | <a href="#">ETTQGWFE</a>   |                            |                            | 425 |
| 15149  | <a href="#">AIRDSMSKLR</a> | <a href="#">ERLEKRRREK</a> | <a href="#">ETTQGWFE</a>   |                            |                            | 425 |
| 13653  | <a href="#">AIRDSMNKLR</a> | <a href="#">ERLEKRRREK</a> | <a href="#">ETTQGWFE</a>   |                            |                            | 426 |
| 15150  | <a href="#">AIRDSMNKLR</a> | <a href="#">ERLEKRRREK</a> | <a href="#">ETTQGWFE</a>   |                            |                            | 426 |
